# Supplementary material for: Super-Low Friction Electrification Achieved on Polytetrafluoroethylene Films-Based Triboelectric Nanogenerators Lubricated by Graphene-Doped Silicone Oil
Source: MDPI journal article supplement (doi:10.3390/mi14091776), 2023-09-16
Supplement: s1 [file s1]

## **Supplementary Material**

# **Super-Low Friction Electrification Achieved on Polytetrafluoroethylene Films-Based Triboelectric Nanogenerators Lubricated by Graphene-Doped Silicone Oil**

Junzhao Chen <sup>†</sup>, Yu Zhao <sup>†</sup>, Ruirui Wang and Pengfei Wang <sup>\*</sup>

Institute of Nanosurface Science and Engineering (INSE), State Key Laboratory of Radio  
Frequency Heterogeneous Integration, College of Mechatronics and Control Engineering,  
Shenzhen University, Shenzhen 518060, China

<sup>\*</sup> Corresponding author. E-mail address: wangpf@szu.edu.cn (P. W.)

<sup>†</sup> These authors contributed equally to this work

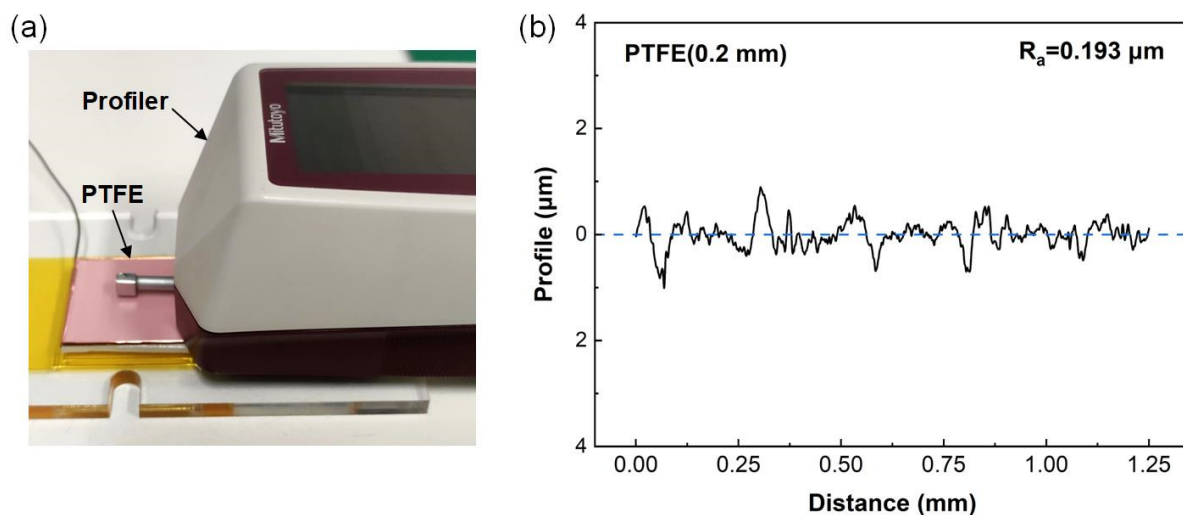

**Figure S1.** Measurement of surface roughness of the pristine PTFE film. (a) Photo of the surface profiler and the pristine PTFE film. (b) Typical surface profile of the pristine PTFE film.

**Table S1.** Surface roughness of the pristine PTFE film (thickness of 0.2 mm).

| No. | $R_a$ ( $\mu\text{m}$ ) |
|-----|-------------------------|
| 1   | 0.194                   |
| 2   | 0.181                   |
| 3   | 0.190                   |
| 4   | 0.193                   |
| 5   | 0.208                   |

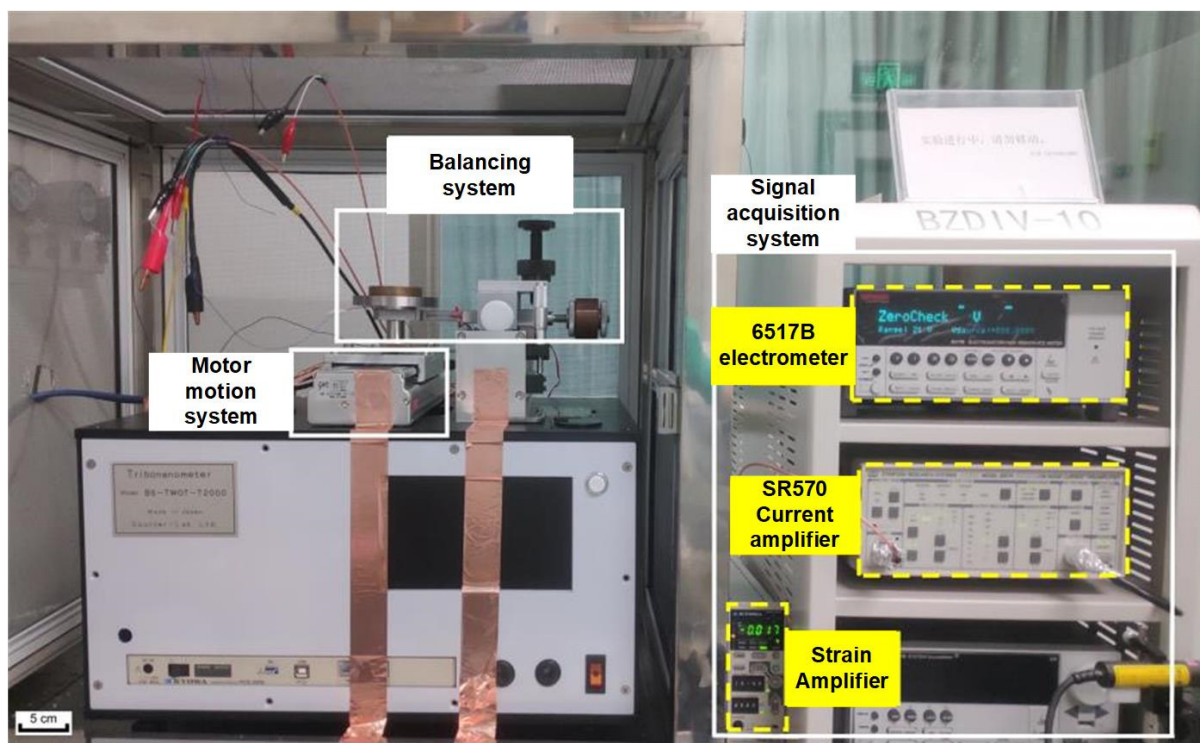

**Figure S2.** Photograph of the customized testing platform containing a ball-on-flat reciprocating sliding tribometer which could simultaneously measure the friction coefficient, short-circuit current, and open-circuit voltage of the PTFE films under dry friction and liquid lubrication conditions.

**Table S2.** Main properties of different liquid lubricants.

| Lubricants          | Description                                            | Dynamic<br>viscosity at 25 °C<br>(mPa·s) | Relative<br>permittivity | Suppliers                       |
|---------------------|--------------------------------------------------------|------------------------------------------|--------------------------|---------------------------------|
| Hexadecane          | 99%                                                    | 3.039[1]                                 | 2.02[2]                  | Shanghai<br>Aichun              |
| Squalane            | 2,6,10,15,19,23-<br>Hexamethyltetracosane              | 28.257[3]                                | 1.92/2.09[4]             | Shanghai<br>Aichun              |
| PAO6                | Poly Alpha Olefin,<br>SpectraSyn 6                     | 45.79[5]                                 | 2.1[6]                   | Chevron<br>Phillips<br>Chemical |
| BMIMPF <sub>6</sub> | 1-Butyl-3-<br>methylimidazolium<br>hexafluorophosphate | 272.86[7]                                | 14.0±0.7[8]              | Shanghai<br>Aichun              |
| Silicone oil        | Polydimethylsiloxane                                   | 47.5[9]                                  | 2.72[9]                  | Dow Corning                     |

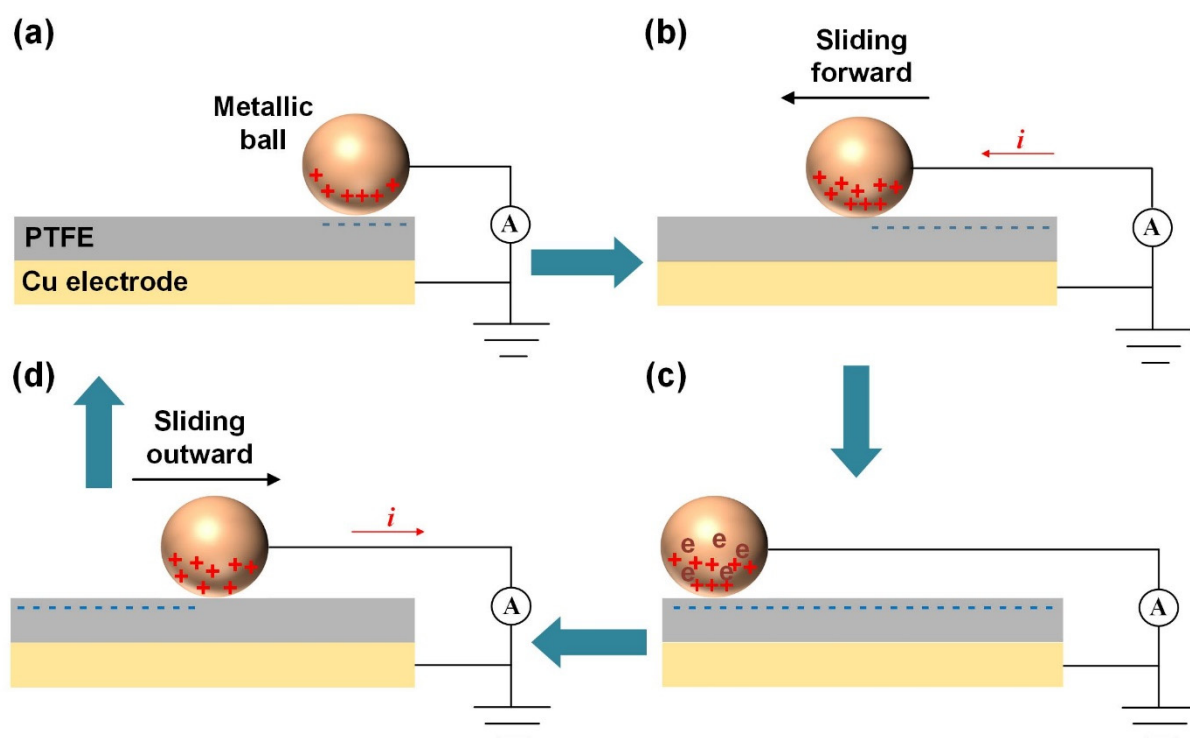

**Figure S3.** Schematic diagram of the working mechanism of the reciprocating sliding-mode TENG based on PTFE film and the metallic ball. (a) When the steel ball and PTFE film come into contact with each other, the steel ball is positively charged and the PTFE film is negatively charged. The net charge is zero due to the equivalent accumulation of positive and negative charges on the contact surface. (b) When the steel ball slides forward (from right to left), free electrons flow from the bottom Cu electrode to the metallic ball. (c) The metallic ball approaches the maximum displacement. (d) When the steel ball slides outward (from left to right), electrons flow back from the metallic ball to the bottom Cu electrode. The output short-circuit current exhibits a bipolar peak shape with alternating positive and negative, as shown in Figure S4c and d.

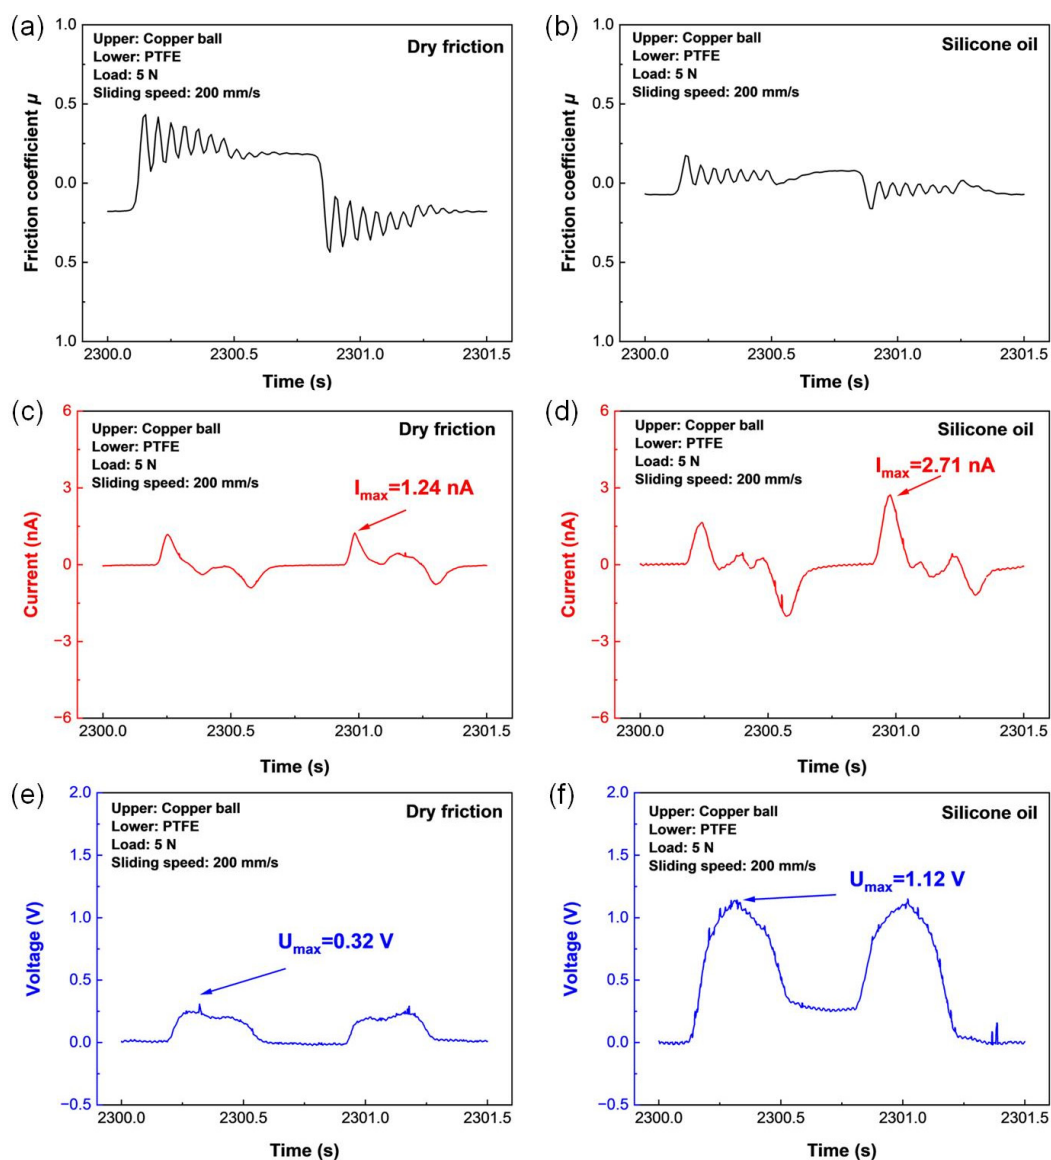

**Figure S4.** Typical triboelectrical performances of the PTFE film sliding against copper ball under (a, c, e) dry friction and (b, d, f) silicone oil lubrication conditions with a load of 5 N and a sliding speed of 200 mm/s in one cycle at steady stage (i.e., 2300 s). (a-b) Friction curve. (c-d) Output short-circuit current. (e-f) Output open-circuit voltage.

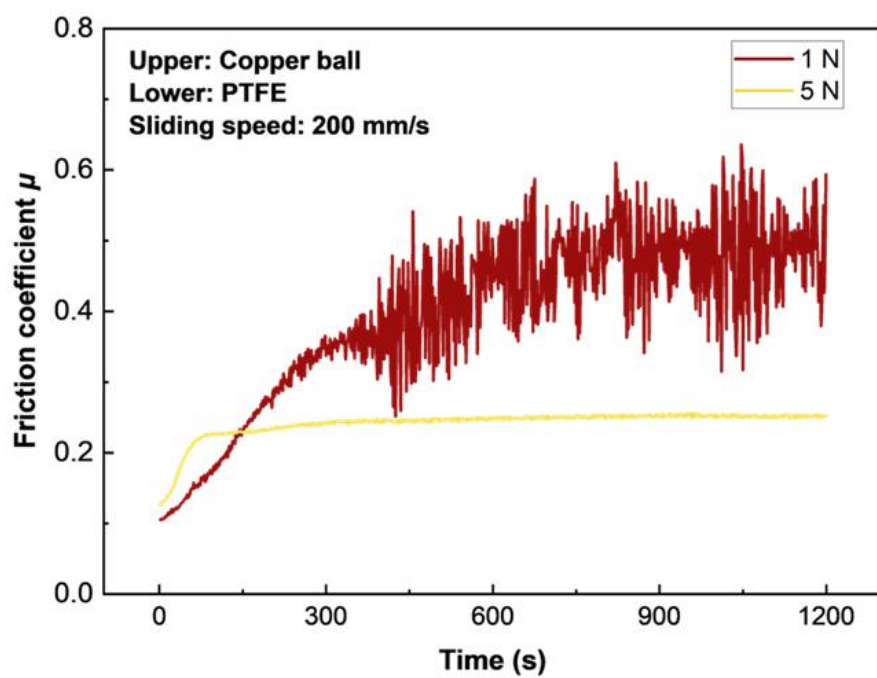

**Figure S5.** Friction curves of the PTFE film sliding against copper ball under dry friction condition with the load of 1 N and 5 N.

**Table S3.** Summary of the studies on low friction electrification mechanism of the TENGs.

| No. | Tribopairs                                   | Lubricants                               | Contact form                                    | Environment            | Friction coefficient | Current & Voltage  | Mechanisms                                                                                                 | Ref.         |
|-----|----------------------------------------------|------------------------------------------|-------------------------------------------------|------------------------|----------------------|--------------------|------------------------------------------------------------------------------------------------------------|--------------|
| 1   | PTFE/<br>Nylon                               | Hexadecane                               | Face to face                                    | Ambient air            | 0.04                 | 15 $\mu$ A<br>60 V | (i) Formation of boundary lubrication film;<br>(ii) Hexadecane film enhanced the surface charge density    | [10]         |
| 2   | Steel/<br>PVDF                               | PAO 4                                    | Ball-on-disc                                    | Ambient air            | 0.06                 | 6 nA<br>0.15 V     | (i) Formation of stable lubricating oil film;<br>(ii) Lubricant suppressed the air breakdown               | [11]         |
| 3   | Steel/<br>PTFE                               | Hexadecane &<br>OLC                      | Face to face                                    | Ambient air            | 0.048                | 400 nA<br>40 V     | (i) “Micro-bearing” effects; (ii) Reducing the generation of PTFE transfer film and enhanced contact area  | [12]         |
| 4   | Graphite/<br>n-Si                            | None                                     | AFM tip controls<br>graphite sliding<br>on n-Si | Ambient air            | 0.0039               | 3.4 nA<br>0.13 V   | (i) Incommensurate crystalline contact; (ii) Non-equilibrium electric field caused electronic drift        | [13]         |
| 5   | Steel/<br>Hydrogen<br>containing<br>DLC film | None                                     | Ball-on-disc                                    | Nitrogen<br>atmosphere | 0.006                | 16 nA<br>1.6 V     | (i) Low energy barrier of the hydrogen-terminated surfaces; (ii) The tribovoltaic of the rubbing interface | [14]         |
| 6   | Steel/<br>PTFE                               | Silicone oil &<br>graphene<br>nanosheets | Ball-on-disc                                    | Ambient air            | 0.008                | 9.24 nA<br>0.95 V  | (i) Formation of graphene-rich transfer film;<br>(ii) Channel effect of the graphene nanosheets            | This<br>work |



**Video S1** Video of measuring the output open-circuit voltage of the PTFE film sliding against steel ball under graphene doped silicone oil lubrication condition.

## References

- [1] Lal, K.; Tripathi, N.; Dubey, G.P. Densities, viscosities, and refractive indices of binary liquid mixtures of hexane, decane, hexadecane, and squalane with benzene at 298.15 K. *J. Chem. Eng. Data* **2000**, *45*, 961–964.
- [2] Aralaguppi, M.I.; Aminabhavi, T.M.; Balundgi, R.H.; Joshi, S.S. Thermodynamic interactions in mixtures of bromoform with hydrocarbons. *J. Phys. Chem.* **1991**, *95*, 5299–5308.
- [3] Dubey, G.P.; Sharma, M.; Oswal, S. Volumetric, transport, and acoustic properties of binary mixtures of 2-methyl-1-propanol with hexadecane and squalane at T = (298.15, 303.15, and 308.15) K: experimental results, correlation, and prediction by the ERAS model. *J. Chem. Thermodyn.* **2009**, *41*, 849–858.
- [4] Bouteloup, R.; Mathieu, D. Predicting dielectric constants of pure liquids: Fragment-based kirkwood-frohlich model applicable over a wide range of polarity. *Phys. Chem. Chem. Phys.* **2019**, *21*, 11043–11057.
- [5] Guimarey, M.J.G.; Comuñas, M.J.P.; López, E.R.; Amigo, A.; Fernández, J. Thermophysical properties of polyalphaolefin oil modified with nanoadditives. *J. Chem. Thermodyn.* **2019**, *131*, 192–205.
- [6] Rosenkranz, A.; Martin, B.; Bettscheider, S.; Gachot, C.; Kliem, H.; Mücklich, F. Correlation between solid-solid contact ratios and lubrication regimes measured by a refined electrical resistivity circuit. *Wear* **2014**, *320*, 51–61.
- [7] Goddu, B.; Tadavarthi, M.M.; Tadekoru, V.K.; Guntupalli, J.N. Density, speed of sound, and dynamic viscosity of 1-butyl-3-methylimidazolium bis(trifluoromethylsulfonyl)imide/1-butyl-3-methylimidazolium hexafluorophosphate and N-methylaniline binary systems from T=298.15 to 323.15 K at 0.1 MPa. *J. Chem. Eng. Data* **2019**, *64*, 2303–2319.
- [8] Huang, M.M.; Jiang, Y.; Sasisanker, P.; Driver, G.W.; Weingärtner, H. Static relative dielectric permittivities of ionic liquids at 25 °C. *J. Chem. Eng. Data* **2011**, *56*, 1494–1499.
- [9] Ishikawa, T.; Yasuda, K.; Igarashi, T.; Yanabu, S.; Ueta, G.; Okabe, S. Effect of temperature on the streaming electrification characteristics of silicone oil. *IEEE T. Dielect. El. In.* **2009**, *16*, 273–280.
- [10] Wang, K.Q.; Li, J.J.; Li, J.F.; Wu, C.Y.; Yi, S.; Liu, Y.F.; Luo, J.B. Hexadecane-containing sandwich structure based triboelectric nanogenerator with remarkable performance enhancement. *Nano Energy* **2021**, *87*, 106198.
- [11] Liu, X.; Zhang, J.J.; Zhang, L.Q.; Feng, Y.G.; Feng, M.; Luo, N.; Wang, D.A. Influence of interface liquid lubrication on triboelectrification of point contact friction pair. *Tribol. Int.* **2022**, *165*, 107323.
- [12] Guo, Y.F.; Zhang, L.Q.; Du, C.H.; Feng, Y.G.; Yang, D.; Zhang, Z.T.; Feng, M.; Wan, Y.; Wang, D.A. Onion-like carbon as nano-additive for tribological nanogenerators with enhanced output performance and stability. *Nano Energy* **2022**, *104*, 107900.
- [13] Huang, X.Y.; Xiang, X.J.; Nie, J.H.; Peng, D.L.; Yang, F.W.; Wu, Z.H.; Jiang, H.Y.; Xu, Z.P.; Zheng, Q.S. Microscale schottky superlubric generator with high direct-current density and ultralong life. *Nat. Commun.* **2021**, *12*, 2268.

- [14]Zhang, L.Q.; Cai, H.F.; Xu, L.; Ji, L.; Wang, D.A.; Zheng, Y.B.; Feng, Y.G.; Sui, X.D.; Guo, Y.F.; Guo, W.L.; Zhou, F.; Liu, W.M.; Wang, Z.L. Macro-superlubric triboelectric nanogenerator based on tribovoltaic effect. *Matter* **2022**, *5*, 1532–1546.
